# Supplementary material for: Identifying Responsive Modules by Mathematical Programming: An Application to Budding Yeast Cell Cycle
Source: PLoS One. 2012 Jul 25;7(7):e41854. doi: 10.1371/journal.pone.0041854 (PMC3405030; doi:10.1371/journal.pone.0041854)
Supplement: Supporting Information S1 — (XLS) [file pone.0041854.s001.xls]

## Sheet: SupplementaryTableS1
Nodes and Edges of the identified modules
Responsive modules for control group
module ID	peak phase	Nodes	Edges
c1	G1	ARC18 ARC15 ARP3 ARC19	ARP3	ARC18
			ARC15	ARP3
			ARC19	ARC15
			ARP3	ARC19
c2	G2/M	SEC31 SEC23 SAR1 HIP1 SEC24 SFB3 CYC1 SFB2	SFB3	SEC23
			SFB3	CYC1
			SEC31	SEC24
			SAR1	SEC23
			HIP1	SEC24
			SEC24	SEC23
			SFB2	SEC23
			SEC31	SEC23
			HIP1	SEC23
			HIP1	SAR1
c3	S	SPC110 SPC97 TUB4 SPC98 SPC72 ATP22	SPC110	SPC98
			TUB4	SPC98
			SPC72	SPC97
			SPC110	SPC97
			ATP22	SPC98
			SPC97	SPC98
			SPC72	SPC98
			SPC97	TUB4
c4	G1	MDM30 IMP2 YPR078C UBX6 TRR2 PPE1 ASR1	PPE1	MDM30
			UBX6	MDM30
			MDM30	ASR1
			MDM30	IMP2
			MDM30	YPR078C
			TRR2	MDM30
c5	G2/M	NUF2 NNF2 BRE1 SMC4 YEL043W	NNF2	YEL043W
			YEL043W	NUF2
			NUF2	SMC4
			NNF2	SMC4
			BRE1	NUF2
			YEL043W	BRE1
c6	G1	PPR1 APL1 JHD2 IML2	PPR1	IML2
			PPR1	JHD2
			PPR1	APL1
c7	S	AAD14 DOT1 IRR1 GAS1 SLG1 FLC2 TGL3 YPL041C AAD4 NAB6 ADH6 ECM7	GAS1	YPL041C
			GAS1	SLG1
			GAS1	FLC2
			GAS1	AAD4
			GAS1	TGL3
			GAS1	NAB6
			GAS1	ADH6
			IRR1	TGL3
			AAD4	AAD14
			GAS1	DOT1
			GAS1	ECM7
c8	G2/M	ARE1 FRM2 ARV1 YLR177W	ARE1	FRM2
			YLR177W	FRM2
			ARE1	ARV1
c9	S	POL2 OYE2 DPB11 DPB2 SLD2	DPB11	POL2
			DPB11	DPB2
			DPB11	SLD2
			OYE2	DPB11
c10	G2/M	VPS38 VPS15 VPS34	VPS15	VPS34
			VPS38	VPS34
c11	S	ERI1 RAS2 PDR17 MTQ1 IRA2 PPS1	ERI1	RAS2
			RAS2	MTQ1
			PPS1	RAS2
			RAS2	IRA2
			RAS2	PDR17
c12	S	YFR017C GDB1 OPT1	GDB1	YFR017C
			OPT1	YFR017C
c13	S	SPT6 HHT2 HHF1 HHT1 HHF2	HHF1	HHT2
			HHF1	SPT6
			HHF1	HHT1
			HHF2	HHT2
			SPT6	HHT2
			HHT1	SPT6
			SPT6	HHF2
			HHT1	HHF2
c14	G1	RHR2 YIG1 HOR2	HOR2	YIG1
			YIG1	RHR2
Responsive modules for MMS group
module ID	peak phase	Nodes	Edges
m1	G2/M	ALG3 WBP1 ALG5 OST2 STT3 OST1 SWP1 RFM1 RNR2 FYV10	RNR2	ALG5
			STT3	OST1
			WBP1	ALG5
			OST2	ALG5
			SWP1	RFM1
			STT3	ALG5
			STT3	SWP1
			WBP1	STT3
			OST1	ALG5
			SWP1	ALG5
			WBP1	SWP1
			ALG3	WBP1
			FYV10	ALG5
m2	G2/M	VPS38 VPS15 VPS34	VPS15	VPS34
			VPS38	VPS34
m3	S	MSH5 SWE1 HSL7 AIM10	HSL7	AIM10
			HSL7	MSH5
			HSL7	SWE1
m4	G2/M	ARE1 FRM2 ARV1 YLR177W	ARE1	ARV1
			ARE1	FRM2
			YLR177W	FRM2
m5	G1	ERG26 ERG25 ERG28 ERG27	ERG25	ERG27
			ERG26	ERG25
			ERG25	ERG28
			ERG28	ERG27
m6	G2/M	SCO2 COX17 SCO1	SCO2	SCO1
			SCO2	COX17
			SCO1	COX17
m7	G1	RKI1 COS10 YEH1	COS10	YEH1
			RKI1	YEH1
m8	S	LCB1 SLC1 ESF1	SLC1	LCB1
			ESF1	LCB1
m9	S	SHO1 THO2 KIN2	SHO1	KIN2
			SHO1	THO2
m10	G1	GLO4 YRO2 RVB1	GLO4	YRO2
			YRO2	RVB1
m11	G1	BUD14 REF2 TVP18 ZPS1	ZPS1	BUD14
			BUD14	TVP18
			BUD14	REF2
m12	G2/M	YFR045W APM2 GAL10	APM2	GAL10
			APM2	YFR045W
m13	G1	GUS1 OPI1 MTC2	MTC2	GUS1
			GUS1	OPI1
m14	G1	STE2 VPS62 YMR265C	VPS62	YMR265C
			VPS62	STE2
m15	G2/M	WHI4 PCL6 YER156C	PCL6	WHI4
			PCL6	YER156C
m16	G1	TRM9 ARG81 ARG80	TRM9	ARG81
			ARG80	ARG81
m17	G1	RHR2 YIG1 HOR2	YIG1	RHR2
			HOR2	YIG1
Responsive modules for Elg1 mutant group
module ID	peak phase	Nodes	Edges
e1	G2/M	PDX1 TOM70 TOM6 TOM7 TOM20 TOM22 TOM40 TOM5	TOM20	TOM22
			TOM7	TOM6
			PDX1	TOM70
			TOM7	TOM22
			TOM7	TOM70
			TOM20	TOM70
			TOM40	TOM70
			TOM40	TOM6
			TOM20	TOM7
			TOM40	TOM5
			TOM40	TOM7
			TOM20	TOM40
			TOM7	TOM5
			TOM40	TOM22
e2	G2/M	CUL3 YBR285W TPO3 YLR297W	CUL3	YLR297W
			YBR285W	TPO3
			YLR297W	TPO3
e3	G2/M	CDC73 VPS71 SLM3 VPS8 QRI5 MDM35 VID30 IST3 BUD13 IES2 MRPS8 RRP6 RTR1	CDC73	VPS71
			CDC73	MRPS8
			CDC73	VPS8
			CDC73	IES2
			CDC73	MDM35
			CDC73	IST3
			CDC73	RRP6
			CDC73	QRI5
			CDC73	RTR1
			CDC73	VID30
			BUD13	IST3
			CDC73	SLM3
			CDC73	BUD13
e4	G2/M	SSC1 MGE1 MDJ1	MDJ1	MGE1
			MDJ1	SSC1
			SSC1	MGE1
e5	G2/M	ALG3 WBP1 ALG5 OST2 STT3 OST1 SWP1 RFM1 RNR2 FYV10	RNR2	ALG5
			STT3	OST1
			WBP1	ALG5
			OST2	ALG5
			SWP1	RFM1
			STT3	ALG5
			STT3	SWP1
			WBP1	STT3
			OST1	ALG5
			SWP1	ALG5
			WBP1	SWP1
			ALG3	WBP1
			FYV10	ALG5
e6	G2/M	RPA12 YBR220C RSM7 YDL129W PET100 CAB5 GDT1 SDH4 YBR219C	RPA12	YDL129W
			RPA12	CAB5
			RPA12	YBR219C
			RPA12	PET100
			RPA12	RSM7
			RPA12	GDT1
			RPA12	SDH4
			RPA12	YBR220C
e7	G2/M	VIK1 SEC61 SSS1 PIM1	SSS1	SEC61
			PIM1	SSS1
			VIK1	SEC61
e8	G1	PRP40 SNU71 ALR1 FAA3	SNU71	PRP40
			ALR1	FAA3
			SNU71	FAA3
Responsive modules for Elg1 mutant MMS group
module ID	peak phases	Nodes	Edges
em1	G2/M(S)	HSC82 YDJ1 STI1 SSA1 CNS1 HSP82	HSC82	STI1
			CNS1	HSC82
			HSC82	YDJ1
			SSA1	YDJ1
			YDJ1	HSP82
			HSC82	HSP82
			STI1	HSP82
			CNS1	HSP82
			SSA1	HSP82
em2	S	OXA1 RPC34 RPC82 RPC31	RPC31	RPC82
			RPC34	RPC82
			OXA1	RPC34
			RPC31	RPC34
em3	G2/M(S)	ALG3 WBP1 ALG5 OST2 STT3 OST1 SWP1 RFM1 RNR2 FYV10	RNR2	ALG5
			STT3	OST1
			WBP1	ALG5
			OST2	ALG5
			SWP1	RFM1
			STT3	ALG5
			STT3	SWP1
			WBP1	STT3
			OST1	ALG5
			SWP1	ALG5
			WBP1	SWP1
			ALG3	WBP1
			FYV10	ALG5
em4	G2/M(S)	DIE2 OST5 OST3 OST4	OST4	OST3
			DIE2	OST5
			DIE2	OST3
em5	G2/M(S)	SCO2 COX17 SCO1	SCO2	SCO1
			SCO2	COX17
			SCO1	COX17
em6	G1	INO80 STT4 GDS1	STT4	GDS1
			INO80	GDS1
em7	G1	HSE1 BUL1 PBI2 STP22 VPS27 PAF1	PBI2	HSE1
			HSE1	STP22
			HSE1	BUL1
			HSE1	PAF1
			HSE1	VPS27
em8	G2/M(S)	RBG2 SUC2 GIR2 FET4	GIR2	RBG2
			RBG2	FET4
			RBG2	SUC2
em9	S	SIS2 SIT4 SAP155 HIS4 SAP185	SAP155	SAP185
			SIT4	SIS2
			SAP155	SIS2
			SAP185	SIS2
			SIT4	SAP185
			SIT4	SAP155
			HIS4	SIT4
em10	G1	CLN1 CLN2 CLN3 BUD2	CLN3	CLN1
			CLN3	BUD2
			CLN1	CLN2
			CLN3	CLN2
			BUD2	CLN2
em11	G2/M(S)	AAH1 SRX1 BTN2 YLR225C	AAH1	YLR225C
			AAH1	SRX1
			BTN2	AAH1
em12	G1	YIR016W MOB2 YOL036W	MOB2	YOL036W
			MOB2	YIR016W
em13	G1	STE5 ZTA1 PMD1	ZTA1	STE5
			STE5	PMD1
em14	G1	ATG19 LAP4 RSB1 YOR302W RRP7 KIN1	KIN1	ATG19
			RRP7	ATG19
			LAP4	ATG19
			YOR302W	RSB1
			YOR302W	LAP4
			YOR302W	ATG19
em15	G2/M(S)	ERD2 SED1 SED4 HEM13	ERD2	SED1
			ERD2	SED4
			HEM13	SED1
em16	G1	VTI1 PEP12 SYN8	VTI1	PEP12
			SYN8	PEP12
			SYN8	VTI1
em17	G2/M(S)	TOM71 TFC7 TFC1 COX14	TOM71	TFC7
			TFC1	TFC7
			TFC7	COX14
em18	G2/M(S)	TPS2 TPS3 PMU1 TSL1	TPS2	TPS3
			TPS2	PMU1
			TPS2	TSL1
			TSL1	TPS3
em19	G2/M(S)	VIK1 SEC61 SSS1 PIM1	SSS1	SEC61
			PIM1	SSS1
			VIK1	SEC61
em20	S	MSH5 SWE1 HSL7 AIM10	HSL7	AIM10
			HSL7	MSH5
			HSL7	SWE1
em21	S	TIM12 MRS2 TIM9	TIM12	MRS2
			TIM12	TIM9
em22	G1	ACS2 YLR049C ACS1	ACS1	ACS2
			YLR049C	ACS1
em23	S	SIF2 PIB2 HOS4	SIF2	HOS4
			SIF2	PIB2
Note: G2/M(S) means that cell cycle arrest at S phase, although time point is at G2/M phase
	Transition modules from 15 min to 30 min under external stimulus: adding MMS
	module ID	Nodes	Edges
	1	ERI1 RAS2 PDR17 MTQ1 IRA2 PPS1	ERI1	RAS2
			RAS2	PDR17
			RAS2	IRA2
			RAS2	MTQ1
			PPS1	RAS2
	2	GPI16 PHO89 YLR137W	PHO89	GPI16
			PHO89	YLR137W
	3	TIR2 YFR016C FLC3	TIR2	YFR016C
			FLC3	TIR2
	4	TIP1 MEP3 YTP1	TIP1	MEP3
			TIP1	YTP1
	5	VPS38 VPS15 VPS34	VPS15	VPS34
			VPS38	VPS34
	Transition modules from 30 min to 45 min under external stimulus: adding MMS
	module ID	Nodes	Edges
	1	RKI1 COS10 YEH1	COS10	YEH1
			RKI1	YEH1
	2	YIL169C TPA1 LPP1 AIF1 SLH1	YIL169C	AIF1
			AIF1	LPP1
			TPA1	LPP1
			SLH1	TPA1
	3	CLN1 CLN2 CLN3 BUD2	CLN3	CLN1
			CLN3	BUD2
			CLN1	CLN2
			CLN3	CLN2
			BUD2	CLN2
	4	PDX1 TOM70 TOM6 TOM7 TOM20 TOM22 TOM40 TOM5	TOM20	TOM22
			TOM7	TOM6
			PDX1	TOM70
			TOM7	TOM22
			TOM7	TOM70
			TOM20	TOM70
			TOM40	TOM70
			TOM40	TOM6
			TOM20	TOM7
			TOM40	TOM5
			TOM40	TOM7
			TOM20	TOM40
			TOM7	TOM5
			TOM40	TOM22
	5	ERI1 RAS2 PDR17 MTQ1 IRA2 PPS1	ERI1	RAS2
			RAS2	PDR17
			RAS2	IRA2
			RAS2	MTQ1
			PPS1	RAS2
	6	INO80 STT4 GDS1	INO80	GDS1
			STT4	GDS1
	7	MTF1 PUT4 ALY2 RRT12	MTF1	PUT4
			ALY2	PUT4
			RRT12	PUT4
	8	ACS2 YLR049C ACS1	ACS1	ACS2
			YLR049C	ACS1
	9	DUG2 SEC21 RET3	SEC21	RET3
			DUG2	SEC21
	10	NUP100 YBP1 YAP1	YBP1	YAP1
			YBP1	NUP100
	11	YUR1 RRD2 RRD1 PEX15	YUR1	PEX15
			RRD1	PEX15
			RRD1	RRD2
	12	YLR143W NSE5 YGK3	NSE5	YGK3
			YLR143W	NSE5
	13	KRE1 VPS28 KEX1	KRE1	KEX1
			KRE1	VPS28
	14	YGL010W YPL257W ALD5	YGL010W	YPL257W
			ALD5	YPL257W
	15	LCD1 RNR1 SML1	RNR1	SML1
			LCD1	SML1
			LCD1	RNR1
	16	YGL230C PNS1 KTI12	YGL230C	PNS1
			YGL230C	KTI12
	17	PKC1 TOS2 KEL2 PPZ2 SKN7	PKC1	TOS2
			PKC1	KEL2
			PKC1	PPZ2
			PKC1	SKN7
	18	ADI1 ATO3 ATG22	ATG22	ADI1
			ADI1	ATO3
	19	VPS38 VPS15 VPS34	VPS15	VPS34
			VPS38	VPS34
	20	ERG11 UBX2 DAP1 SSH1	ERG11	DAP1
			ERG11	UBX2
			ERG11	SSH1
	Transition modules from 15 min to 30 min under internal stimulus: knocking out Elg1
	module ID	Nodes	Edges
	1	LSM6 GNT1 YMR221C	LSM6	GNT1
			LSM6	YMR221C
	2	PMT2 ALG6 PMT1 PMT4 PMT3	PMT4	PMT3
			PMT2	PMT1
			PMT1	PMT4
			PMT2	PMT4
			PMT2	PMT3
			PMT1	PMT3
			ALG6	PMT2
			ALG6	PMT1
	3	SLT2 ECM33 MNN10 PCL2 BCK1 YLR346C SWI5 MNN2 GGA2	SLT2	SWI5
			SLT2	YLR346C
			SLT2	GGA2
			SLT2	ECM33
			SLT2	MNN10
			PCL2	BCK1
			PCL2	SLT2
			PCL2	SWI5
			MNN2	SLT2
			MNN2	BCK1
	4	CUL3 YBR285W TPO3 YLR297W	CUL3	YLR297W
			YBR285W	TPO3
			YLR297W	TPO3
	5	SPT6 HHT2 HHF1 HHT1 HHF2	HHF1	HHT2
			HHF1	SPT6
			HHF1	HHT1
			HHF2	HHT2
			SPT6	HHT2
			HHT1	SPT6
			SPT6	HHF2
			HHT1	HHF2
	6	TIP1 MEP3 YTP1	TIP1	YTP1
			TIP1	MEP3
	7	ALG3 WBP1 ALG5 OST2 STT3 OST1 SWP1 RFM1 RNR2 FYV10	RNR2	ALG5
			STT3	OST1
			WBP1	ALG5
			OST2	ALG5
			SWP1	RFM1
			STT3	ALG5
			STT3	SWP1
			WBP1	STT3
			OST1	ALG5
			SWP1	ALG5
			WBP1	SWP1
			ALG3	WBP1
			FYV10	ALG5
	8	CDC7 DBF4 TIF1 ARG3 TIF2 HIR3 MUB1 PTM1 DED1	TIF2	TIF1
			CDC7	TIF1
			DBF4	TIF1
			CDC7	HIR3
			TIF2	DED1
			TIF1	DED1
			CDC7	PTM1
			CDC7	ARG3
			DBF4	HIR3
			CDC7	DBF4
			CDC7	MUB1
			CDC7	TIF2
	9	NUP100 YBP1 YAP1	YBP1	YAP1
			YBP1	NUP100
	10	SSA4 CIT3 ALG2 DOS2	CIT3	SSA4
			SSA4	ALG2
			SSA4	DOS2
	11	CSN9 IKI1 YJR015W	YJR015W	CSN9
			IKI1	YJR015W
	12	ERI1 RAS2 PDR17 MTQ1 IRA2 PPS1	RAS2	MTQ1
			PPS1	RAS2
			RAS2	PDR17
			ERI1	RAS2
			RAS2	IRA2
	13	UTP15 FMN1 UTP5	UTP5	UTP15
			FMN1	UTP5
	14	PPR1 APL1 JHD2 IML2	PPR1	JHD2
			PPR1	IML2
			PPR1	APL1
	15	LAS21 ECM8 IMP2	LAS21	ECM8
			LAS21	IMP2'
	16	GLK1 EMI2 SHE3 ARG2 FIG1	GLK1	EMI2
			GLK1	ARG2
			ARG2	SHE3
			FIG1	GLK1
	17	INO80 STT4 GDS1	INO80	GDS1
			STT4	GDS1
	18	NUP42 BAG7 HAM1	HAM1	NUP42
			NUP42	BAG7
	19	YOL083W RHB1 AMS1	RHB1	YOL083W
			AMS1	YOL083W
	20	PKC1 TOS2 KEL2 PPZ2 SKN7	PKC1	TOS2
			PKC1	SKN7
			PKC1	KEL2
			PKC1	PPZ2
	21	SFG1 YAE1 IZH1	IZH1	YAE1
			SFG1	IZH1
	22	MAC1 PPT1 HEM15 ADR1 TMN3	PPT1	HEM15
			PPT1	MAC1
			PPT1	TMN3
			ADR1	PPT1
	23	YAF9 LAC1 LAG1 LIP1	YAF9	LAC1
			LAC1	LIP1
			LAG1	LAC1
			LIP1	LAG1
	24	VPS38 VPS15 VPS34	VPS15	VPS34
			VPS38	VPS34
	25	CTM1 YGR071C NOP9	NOP9	CTM1
			CTM1	YGR071C
	26	RKI1 COS10 YEH1	COS10	YEH1
			RKI1	YEH1
	27	NRP1 YBL081W NGR1	NRP1	NGR1
			NRP1	YBL081W
	28	KRE1 VPS28 KEX1	KRE1	KEX1
			KRE1	VPS28
	29	SYH1 COS2 YPR063C	SYH1	COS2
			YPR063C	COS2
	30	MPD1 ASA1 PDI1 EUG1	PDI1	EUG1
			PDI1	MPD1
			MPD1	ASA1
	31	STE5 ZTA1 PMD1	STE5	PMD1
			ZTA1	STE5
	32	SEC31 SEC23 SAR1 HIP1 SEC24 SFB3 CYC1 SFB2	HIP1	SEC24
			SFB3	SEC23
			SEC31	SEC24
			HIP1	SEC23
			SAR1	SEC23
			HIP1	SAR1
			SEC31	SEC23
			SFB3	CYC1
			SFB2	SEC23
			SEC24	SEC23
	33	YGR035C RTC5 CRS5	YGR035C	RTC5
			YGR035C	CRS5
	34	YIL169C TPA1 LPP1 AIF1 SLH1	TPA1	LPP1
			YIL169C	AIF1
			SLH1	TPA1
			AIF1	LPP1
	Transition modules from 30 min to 45 min under internal stimulus: knocking out Elg1
	module ID	Nodes	Edges
	1	CUL3 YBR285W TPO3 YLR297W	CUL3	YLR297W
			YBR285W	TPO3
			YLR297W	TPO3
	2	PKC1 TOS2 KEL2 PPZ2 SKN7	PKC1	TOS2
			PKC1	SKN7
			PKC1	KEL2
			PKC1	PPZ2
	3	TMA19 DHH1 YER140W	YER140W	DHH1
			YER140W	TMA19
	4	ARE1 FRM2 ARV1 YLR177W	YLR177W	FRM2
			ARE1	FRM2
			ARE1	ARV1
	5	MAC1 PPT1 HEM15 ADR1 TMN3	PPT1	MAC1
			PPT1	HEM15
			PPT1	TMN3
			ADR1	PPT1
	6	RKI1 COS10 YEH1	COS10	YEH1
			RKI1	YEH1
	Transition modules from 15 min to 30 min under both internal and external stimulus: knocking out Elg1 and adding MMS
	module ID	Nodes	Edges
	1	PMT2 ALG6 PMT1 PMT4 PMT3	PMT4	PMT3
			PMT2	PMT1
			PMT1	PMT4
			PMT2	PMT4
			PMT2	PMT3
			PMT1	PMT3
			ALG6	PMT2
			ALG6	PMT1
	2	TIP1 MEP3 YTP1	TIP1	YTP1
			TIP1	MEP3
	3	MAC1 PPT1 HEM15 ADR1 TMN3	PPT1	MAC1
			PPT1	HEM15
			PPT1	TMN3
			ADR1	PPT1
	Transition modules from 30 min to 45 min under both internal and external stimulus: knocking out Elg1 and adding MMS
	module ID	Nodes	Edges
	1	SSD1 LST8 TOR1 KOG1 TOR2	TOR2	LST8
			TOR1	LST8
			TOR1	TOR2
			SSD1	TOR1
			KOG1	LST8
			KOG1	TOR1
	2	ERG26 ERG25 ERG28 ERG27	ERG25	ERG27
			ERG26	ERG25
			ERG25	ERG28
			ERG28	ERG27
	3	CLN1 CLN2 CLN3 BUD2	CLN3	CLN2
			BUD2	CLN2
			CLN3	CLN1
			CLN1	CLN2
			CLN3	BUD2
